# Supplementary material for: Molecular engineering of a high quantum yield NIR-II molecular fluorophore with aggregation-induced emission (AIE) characteristics for in vivo imaging
Source: Royal Society of Chemistry journal article supplement (doi:10.1039/c9nr09999a), 2020-01-01
Supplement: c9nr09999a1.pdf [file c9nr09999a1.pdf]

**Supplementary data for**

**Molecular engineering of a high quantum yield NIR-II  
molecular fluorophore with aggregation-induced emission  
(AIE) characteristics for in vivo imaging**

Pengfei Xu<sup>#a,b</sup>, Fei Kang<sup>#a</sup>, Weidong Yang<sup>#a</sup>, Mingru Zhang<sup>a</sup>, Ruili Dang<sup>b</sup>, Pei Jiang<sup>b\*</sup>  
and Jing Wang<sup>a\*</sup>

<sup>a</sup>Department of Nuclear Medicine, Xijing Hospital, Fourth Military Medical University, 710032, #127 West Changle Road, Xi'an, Shaanxi, China;

<sup>b</sup>Institute of Clinical Pharmacy & Pharmacology, Jining First People's Hospital, Jining Medical University, Jining 272000, P.R. China.

\* Author of correspondence:

Dr. Pei Jiang, Institute of Clinical Pharmacy & Pharmacology, Jining First People's Hospital, Jining Medical University, Jining 272000, P.R. China. Email: jiangpeicsu@sina.com.

Prof. Jing Wang, Department of Nuclear Medicine, Xijing Hospital, Fourth Military Medical University, 710032, #127 West Changle Road, Xi'an, Shaanxi, China. Email: wangjing@fmmu.edu.cn

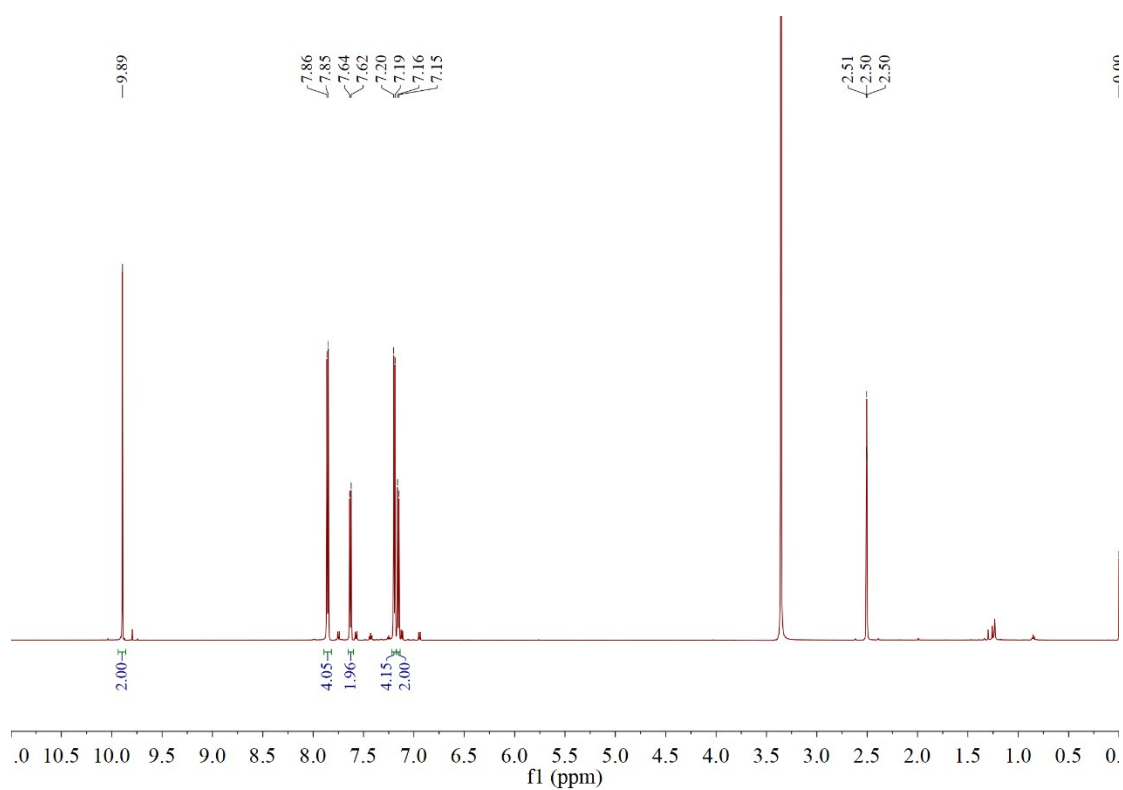

**Figure S1.** <sup>1</sup>H NMR spectrum of 4,4'-((4-bromophenyl)azanediyl)dibenzaldehyde in CDCl<sub>3</sub>.

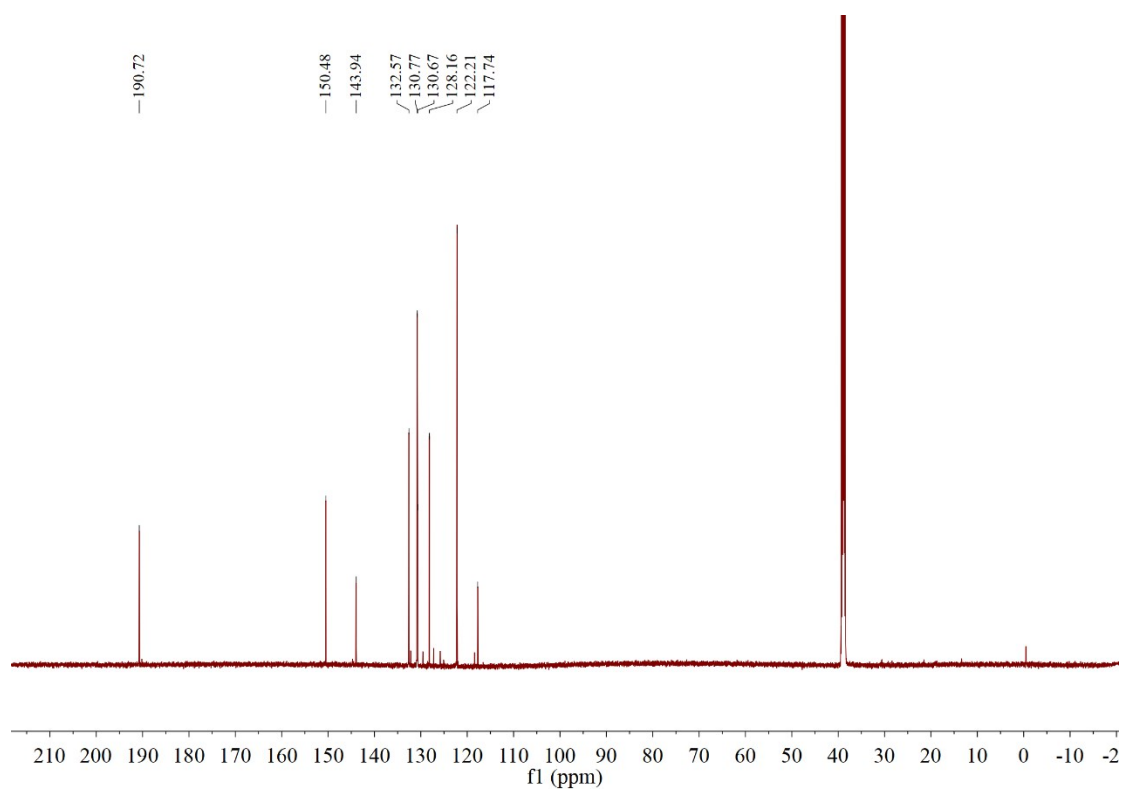

**Figure S2.** <sup>13</sup>C NMR spectrum of 4,4'-((4-bromophenyl)azanediyl)dibenzaldehyde in CDCl<sub>3</sub>.

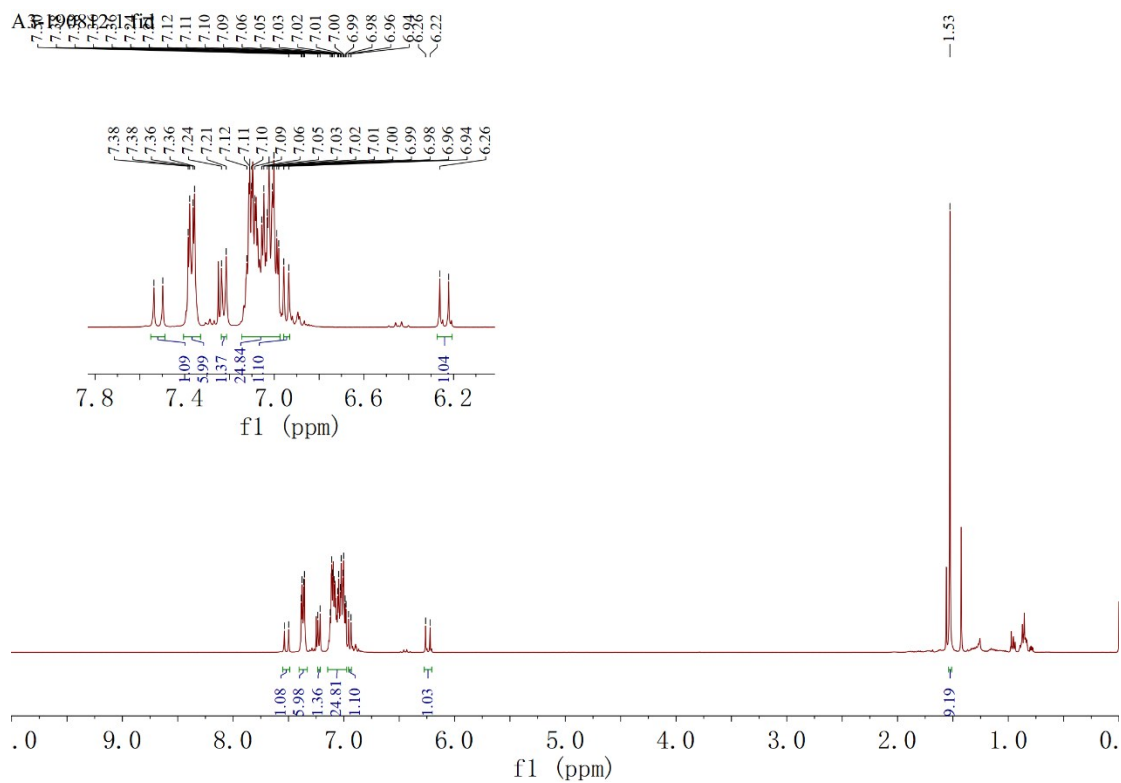

**Figure S3.**  $^1\text{H}$  NMR spectrum of compound **3** in  $\text{CDCl}_3$ .

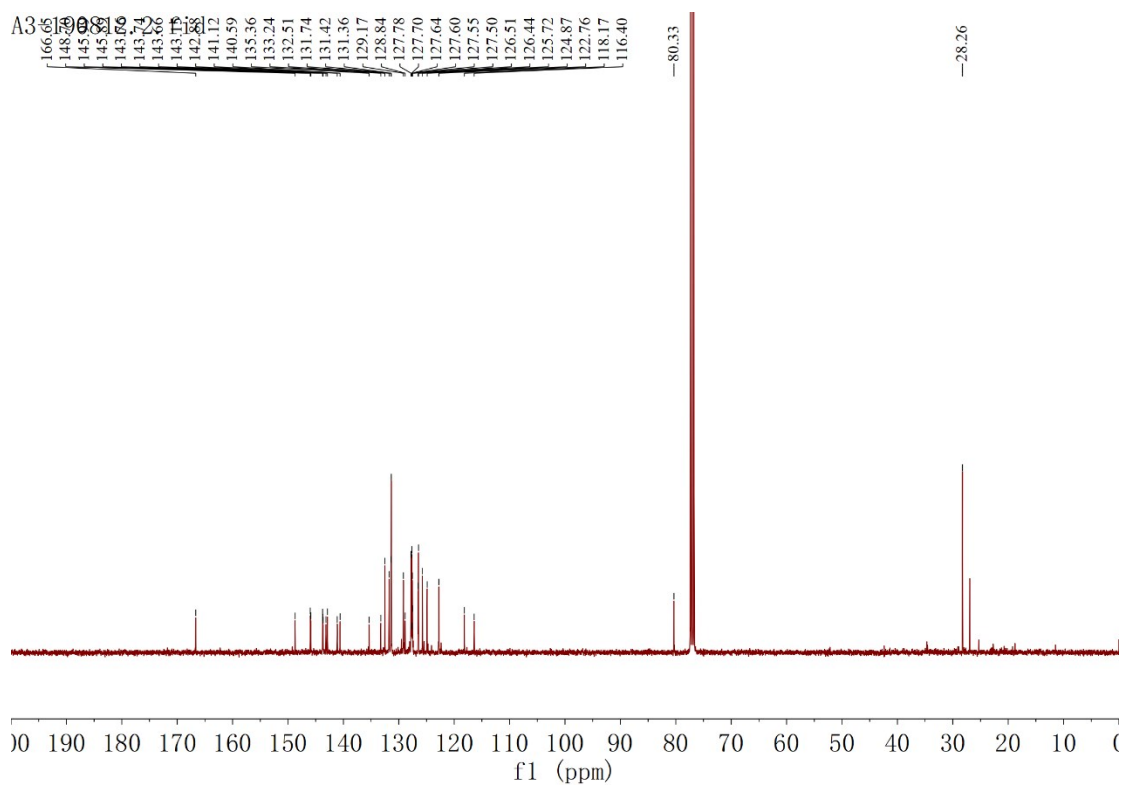

**Figure S4.**  $^{13}\text{C}$  NMR spectrum of compound **3** in  $\text{CDCl}_3$ .

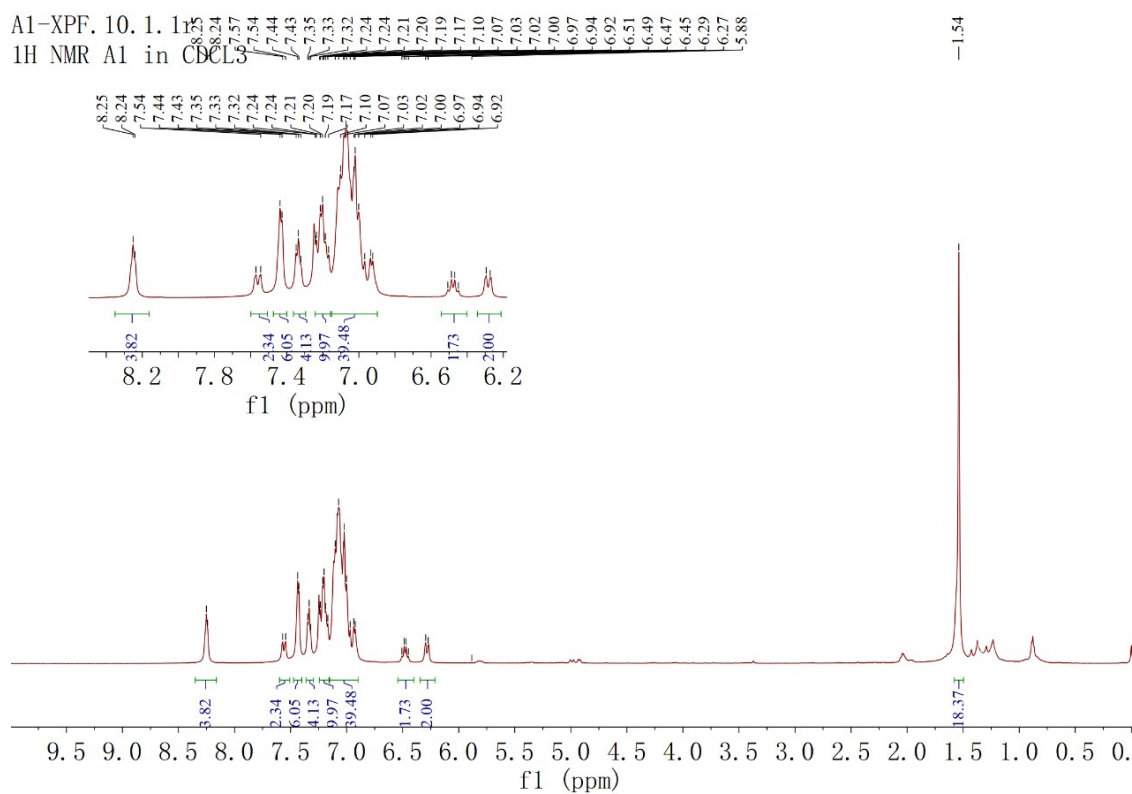

**Figure S5.** <sup>1</sup>H NMR spectrum of **XA1** in CDCl<sub>3</sub>.

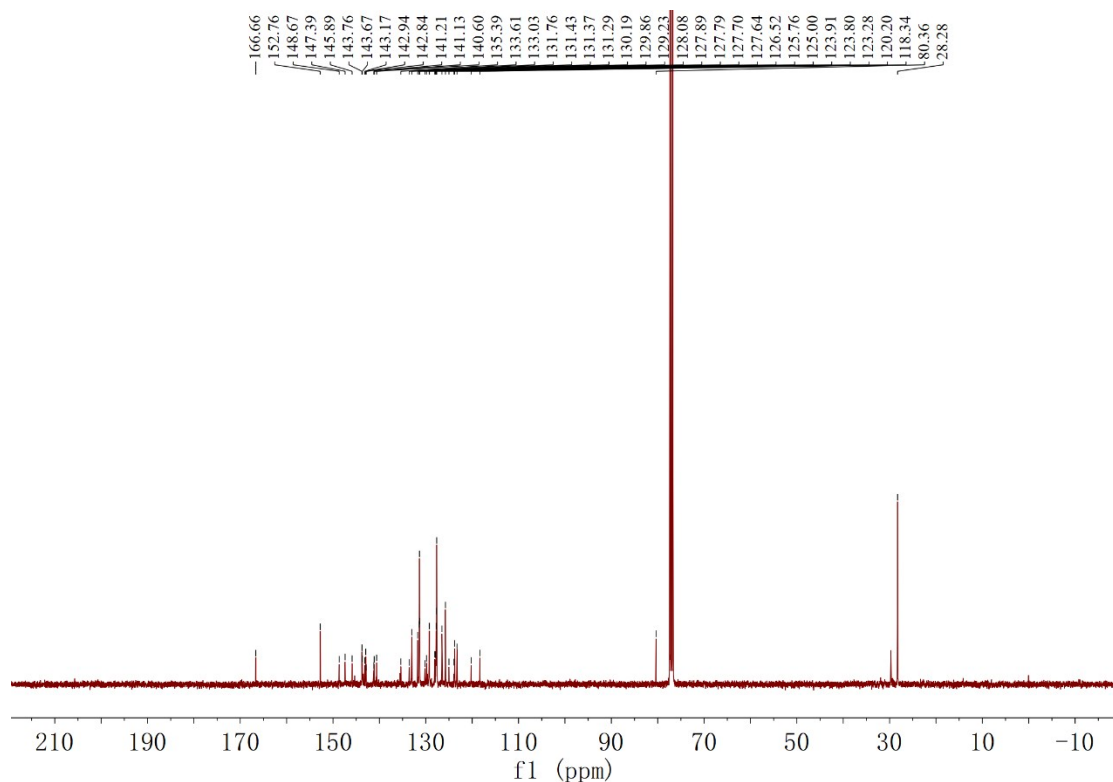

**Figure S6.** <sup>13</sup>C NMR spectrum of **XA1** in CDCl<sub>3</sub>.

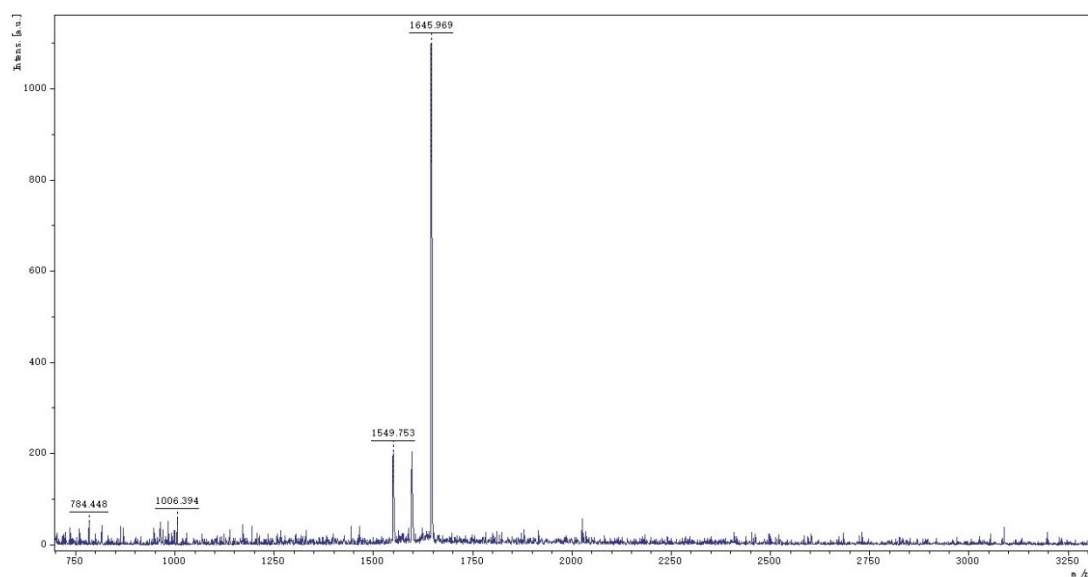

**Figure S7.** MALDI-TOF-MS measurement of **XA1**.

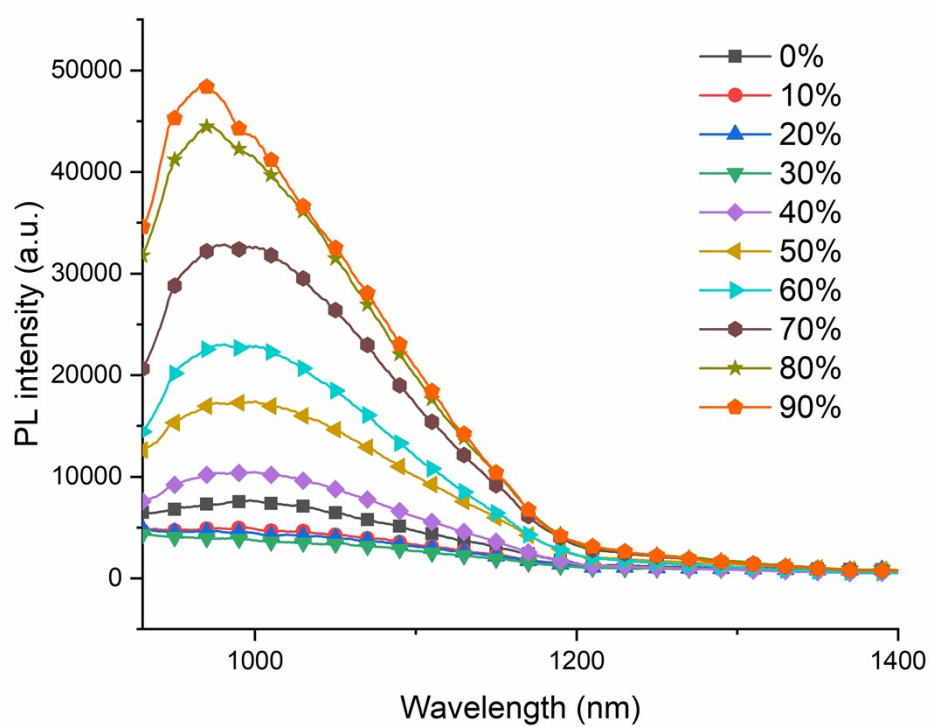

**Figure S8.** The emission spectra of **XA1** with different  $f_w$ .

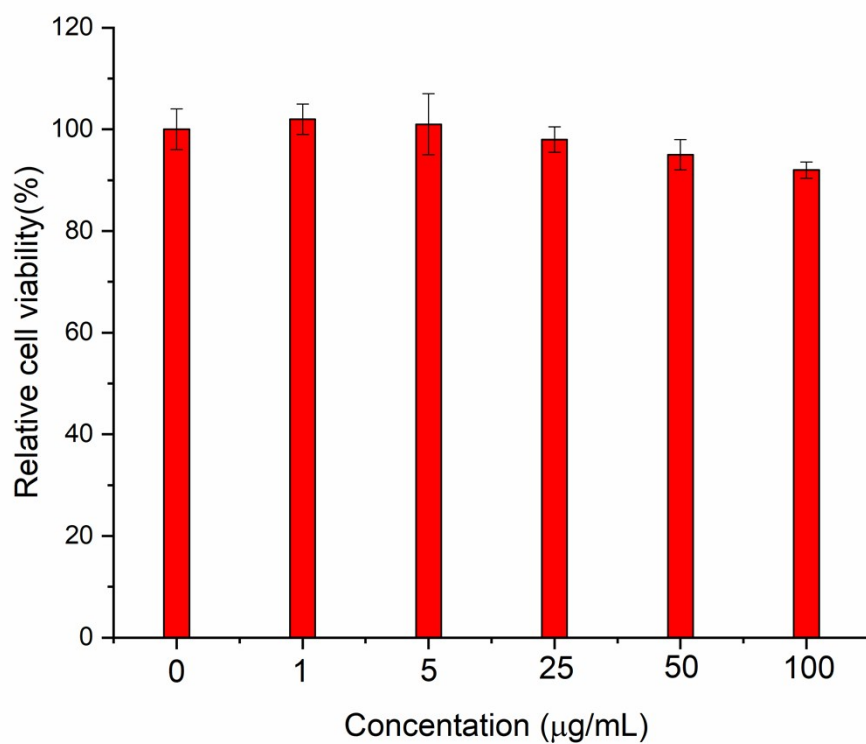

**Figure S9.** Cell viability of HeLa cells after incubation with aqueous dispersion of **XA1** NPs with various concentrations for 48 h.

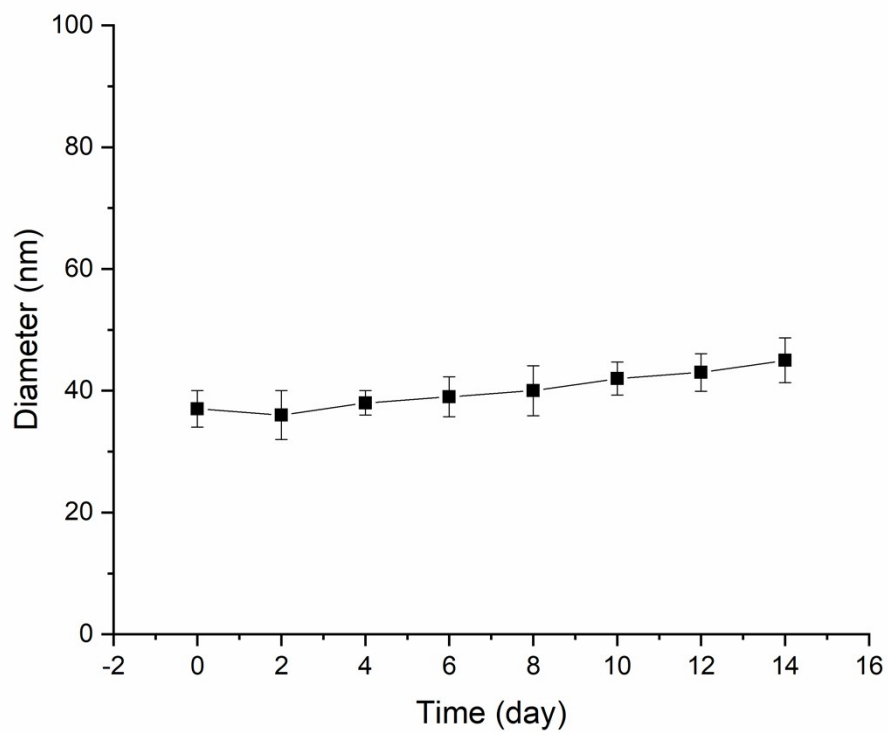

**Figure S10.** DLS results of XA1 NPs in water over 14 days.

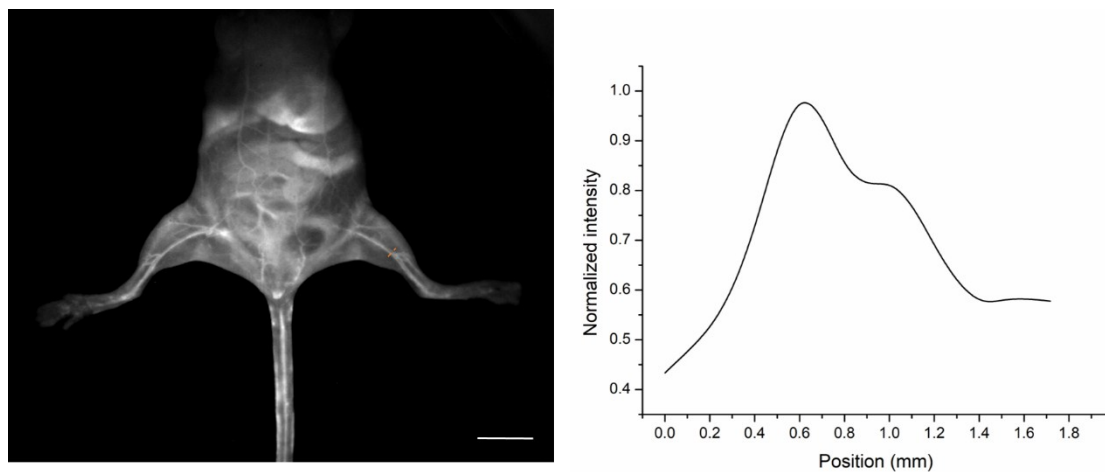

**Figure S11.** The line profile of the fluorescence intensity. Scale bar: 1 cm.

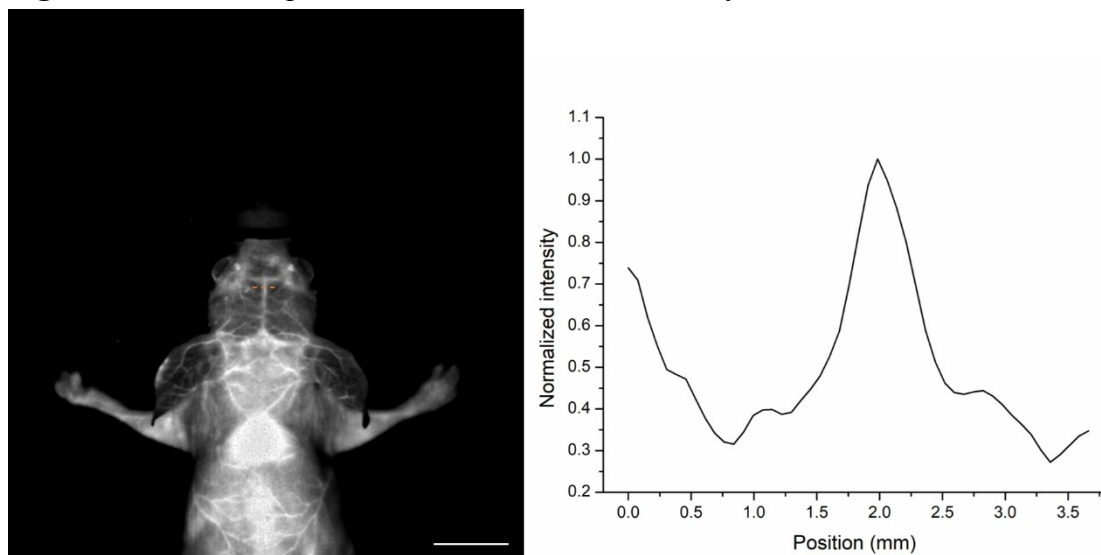

**Figure S12.** The line profile of the fluorescence intensity. Scale bar: 1 cm.

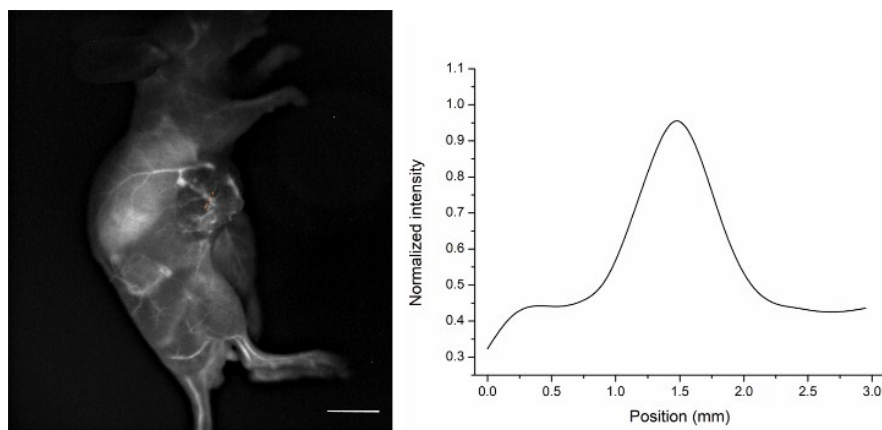

**Figure S13.** The line profile of the fluorescence intensity in the NIR II image of CT-



26 tumor-bearing nude mice (tumor size  $\approx 0.75 \text{ cm}^3$ ). The image was captured at 1 min time points after a tail vein injection of **XA1** NPS. S/B= $2.7 \pm 0.2$ .

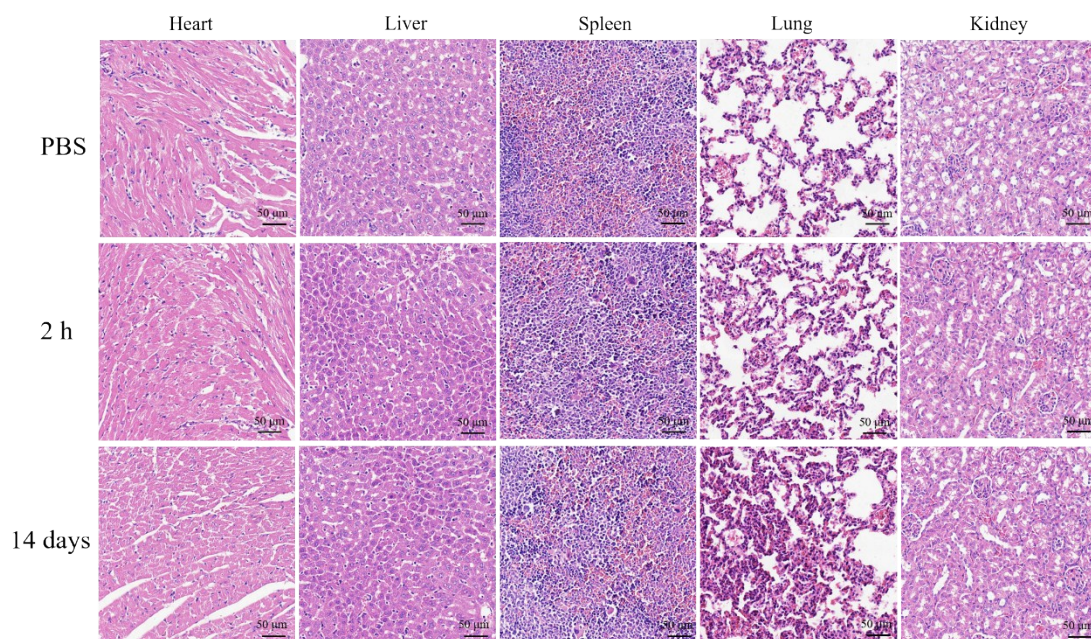

Figure S14. Histological H&E staining for main organs (heart, liver, spleen, lung and kidney) of the mice intravenously administrated with PBS and **XA1** NPs (10 times than the imaging doses, 5 mg of XA1 per kg mouse) for 2 h and 14 days.

The QY of XA1 was calculated according the previous reported calculation method.<sup>1-3</sup>

$$QY_{sample} = QY_{ref} \frac{slope_{sample}}{slope_{ref}} \left( \frac{n_{sample}}{n_{ref}} \right)^2$$

The QYs were measured by the linear-regression plot of integrated fluorescent intensities at different concentrations on a molar basis. Where  $QY_{ref}$  of IR-26 in dichloroethane is 0.5%, and  $n_{sample}$  and  $n_{ref}$  are the refractive index of water and dichloroethane, respectively.

$$QY = 0.5\% \times \frac{29179925.14}{835364.08} \times \left( \frac{1.33}{1.4448} \right)^2 = 14.8\%$$

1. K. Cheng, H. Chen, C. H. Jenkins, G. Zhang, W. Zhao, Z. Zhang, F. Han, J. Fung, M. Yang, Y. Jiang, L. Xing and Z. Cheng, *ACS Nano*, 2017, **11**, 12276-12291.
2. Z. Sheng, B. Guo, D. Hu, S. Xu, W. Wu, W. H. Liew, K. Yao, J. Jiang, C. Liu, H. Zheng and B. Liu, *Adv Mater*,



2018, **29**, 1800766-1800774.

3. H. Wan, J. Yue, S. Zhu, T. Uno, X. Zhang, Q. Yang, K. Yu, G. Hong, J. Wang, L. Li, Z. Ma, H. Gao, Y. Zhong, J. Su, A. L. Antaris, Y. Xia, J. Luo, Y. Liang and H. Dai, *Nat Commun*, 2018, **9**, 1171.
